# Supplementary material for: The Effects of Feeding Waste Milk Containing Antimicrobial Residues on Dairy Calf Health
Source: PubMed Central journal article supplement (PMC7911522; doi:10.3390/pathogens10020112), 2021-01-22
Supplement: pathogens-10-00112-s001.pdf [file pathogens-10-00112-s001.pdf]

Table S1: Summary of studies published between 2016-2020 and included in this narrative review – demographics, results and study descriptions

| Author & Year [Ref.]                         | Country | Number of animals | Effects of waste milk feeding                                                                                                                                                                                                                                                                                                                                                            | Feeding groups                                  | Antimicrobials assessed in feed                      | Sampling                                                                      | Waste milk - natural or artificially spiked with antimicrobials |
|----------------------------------------------|---------|-------------------|------------------------------------------------------------------------------------------------------------------------------------------------------------------------------------------------------------------------------------------------------------------------------------------------------------------------------------------------------------------------------------------|-------------------------------------------------|------------------------------------------------------|-------------------------------------------------------------------------------|-----------------------------------------------------------------|
| <b>Awosile et al, (2018) [20]</b>            | Canada  | 488 calves        | <i>Salmonella enterica</i> isolated in 3.3% of samples, all were susceptible to all antimicrobials tested. Faecal carriage of <i>E.coli</i> with reduced susceptibility to cephalosporins (ESC) reported at frequency of 81.2% using selective culture. All tested isolates were multi-drug resistant. Feeding of unpasteurised nonsaleable milk associated with faecal recovery of ESC. | Unpasteurised waste milk was fed on these farms | Ceftiofur most commonly used (but not assessed here) | Faecal samples from calves<br>1) Between day 2-15<br>2) Between day 42 and 56 | Natural                                                         |
| <b>Calderon-Amor &amp; Gallo (2020) [22]</b> | Chile   | 700 calves        | Factors associated with diarrhoea included using milk replacer or untreated waste milk compared to pasteurised/acidified waste milk                                                                                                                                                                                                                                                      | Waste milk was fed on these farms               | (Survey)                                             | Survey of management. Calf health assessed at one on farm visit               | Natural                                                         |

Table S1: Summary of studies published between 2016-2020 and included in this narrative review – demographics, results and study descriptions

|                                            |              |                   |                                                                                                                                                                                                                                          |                                                                                                                                             |                                                                                                        |                                                                                                                                        |                   |
|--------------------------------------------|--------------|-------------------|------------------------------------------------------------------------------------------------------------------------------------------------------------------------------------------------------------------------------------------|---------------------------------------------------------------------------------------------------------------------------------------------|--------------------------------------------------------------------------------------------------------|----------------------------------------------------------------------------------------------------------------------------------------|-------------------|
| <p><b>Deng et al, (2017) [23]</b></p>      | <p>China</p> | <p>84 calves</p>  | <p>Differences in microbial richness (taxonomic groups) of bacteria; Increased prevalence of pathogenic bacteria; expression of genes related to metabolic diseases;</p>                                                                 | <p>1) untreated bulk milk (UBM)<br/>2) acidified waste milk (AWM)<br/>3) pasteurised waste milk (PMW)<br/>4) untreated waste milk (UWM)</p> | <p>Various (mixture) including <math>\beta</math>-Lactams, Aminoglycoside, Tetracycline, Macrolide</p> | <p>12 calves randomly euthanised on day 21: Mucosa and digesta samples (rumen, caecum, colon, faeces), 3 animals per feeding group</p> | <p>Natural</p>    |
| <p><b>Edrington et al, (2018) [24]</b></p> | <p>USA</p>   | <p>211 calves</p> | <p>No statistically significant difference with respect to the excretion (yes/no) of <i>Salmonella</i> spp.; differences with the serotypes<br/>Majority susceptible to all antimicrobials tested</p>                                    | <p>1) Pasteurised waste milk (PWM); 128 calves;<br/>2) Nonpasteurised waste milk (NPWM); 83 calves</p>                                      | <p>Not known</p>                                                                                       | <p>WM &amp; faecal samples: weekly at 1-4 weeks of age, &amp; at weaning.</p>                                                          | <p>Natural</p>    |
| <p><b>Feng et al, (2020) [25]</b></p>      | <p>USA</p>   | <p>10 calves</p>  | <p>No effect on bacterial cell function categories -except in the “phage, prophage and transposable elements” category, which indicates increased susceptibility of the calf microbiome to the transfer of antimicrobial resistance;</p> | <p>1) Pasteurised whole milk<br/>2) Pasteurised whole milk with pirlimycin added</p>                                                        | <p>Pirlimycin (0.2mg/L) (day 2 to 50)</p>                                                              | <p>Faecal Samples on day 1, 42 and 84 before feeding</p>                                                                               | <p>Artificial</p> |

Table S1: Summary of studies published between 2016-2020 and included in this narrative review – demographics, results and study descriptions

|                                         |              |                                        |                                                                                                                                                                                                                   |                                                                                                                           |                                                                                                                                                    |                                                                                                                                                                                                                                             |                             |
|-----------------------------------------|--------------|----------------------------------------|-------------------------------------------------------------------------------------------------------------------------------------------------------------------------------------------------------------------|---------------------------------------------------------------------------------------------------------------------------|----------------------------------------------------------------------------------------------------------------------------------------------------|---------------------------------------------------------------------------------------------------------------------------------------------------------------------------------------------------------------------------------------------|-----------------------------|
| <p><b>Foutz et al. (2018) [26]</b></p>  | <p>USA</p>   | <p>74 calves</p>                       | <p>Calves fed MMR and PNM more frequently excreted multi-resistant bacteria, overall resistance levels fell over time, no difference between feeds at 16 weeks.</p>                                               | <p>1) PNM (pasteurised nonsaleable milk)<br/>2) MMR (medicated milk replacer)<br/>3) NMR (nonmedicated milk replacer)</p> | <p>MMR contained: neoterramycin, neomycin, oxytetracycline, chlortetracycline.<br/>PNM contained ampicillin, cephalixin, penicillin, ceftiofur</p> | <p>Faecal samples (week 1, 3, 5, 16)</p>                                                                                                                                                                                                    | <p>Natural/Medicated MR</p> |
| <p><b>Horton et al, (2016) [27]</b></p> | <p>UK</p>    | <p>250 Cows and 40 unweaned Calves</p> | <p>93 % of the faecal samples (calves, cows) contained <i>E.coli</i> isolates with CTX-M genes, 100% of the unweaned calves carried CTX-M <i>E.coli</i>, prevalence of CTX-M <i>E.coli</i> decreased with age</p> | <p>Waste milk was fed on this farm</p>                                                                                    | <p>Most frequently detected were cefquinome and cefalexin in waste milk</p>                                                                        | <p>Faecal samples, waste milk samples, environmental samples; six visits with longitudinal sampling of calves (n=20), follow up 1 year later</p>                                                                                            | <p>natural</p>              |
| <p><b>Li et al, (2019) [28]</b></p>     | <p>China</p> | <p>20 bull calves</p>                  | <p>No difference seen in the diversity of the microbiome, no effect on liveweight. lower incidence of diarrhoea in spiked milk replacer group.<br/>Stimulated development of ruminal papillae.</p>                | <p>1) Milk replacer spiked with antibiotics (ANT)<br/>2) Milk replacer without antibiotics (CON)</p>                      | <p>Penicillin (0.024mg/l), Streptomycin (0.025mg/l), Tetracycline (0.1mg/l), Ceftiofur (0.33 mg/l)</p>                                             | <p>Rumen fluid:<br/>15., 25., 35. Tag for pH, volatile fatty acids and NH<sub>3</sub>-N;<br/>10 samples from day 35 investigated for microbial community;<br/>Faecal consistency and feed intake daily;<br/>Liveweight, withers height,</p> | <p>Artificial</p>           |

Table S1: Summary of studies published between 2016-2020 and included in this narrative review – demographics, results and study descriptions

|                                  |                |             |                                                                                                                                                                                                                                                                                                       |                                                                                    |                                                                                                                                  |                                                                                                                                          |         |
|----------------------------------|----------------|-------------|-------------------------------------------------------------------------------------------------------------------------------------------------------------------------------------------------------------------------------------------------------------------------------------------------------|------------------------------------------------------------------------------------|----------------------------------------------------------------------------------------------------------------------------------|------------------------------------------------------------------------------------------------------------------------------------------|---------|
|                                  |                |             |                                                                                                                                                                                                                                                                                                       |                                                                                    |                                                                                                                                  | body length and heart girth:<br>Day 1, 7, 14, 21, 28, 35                                                                                 |         |
| <b>Manga et al, (2019) [29]</b>  | Czech Republic | 13 calves   | 94 % of the faecal samples contained cefotaxime-resistant <i>E.coli</i> (CREC) using selective culture, later confirmed as AmpC-producing; all calves were positive on day 1 or 2, 90 % of cefotaxime-resistant <i>E.coli</i> were multi-resistant; Frequency of isolation of CREC decreased with age | Calves were fed milk with antimicrobial residues on this farm – no further details | AM Usage on the farm included lincomycin, oxytetracycline, amoxicillin/ clavulanic acid, marbofloxacin, cefquinome, cefoperazone | Faecal samples from calves until day 63, environmental samples, feed samples, faecal samples from the 13 dams before calving             | Natural |
| <b>Maynou et al (2017a) [30]</b> | Spain          | 20±5 calves | Increased excretion of resistant and multi-resistant <i>E. coli</i> (9 antimicrobials tested), reduced excretion with calf age. Increased prevalence of colistin-resistant <i>Pasteurella multocida</i> ; Calf isolates similar to environmental ones, not to those from the dams                     | 1) Waste milk (WM)<br>2) Milk replacer (MR)                                        | Not known                                                                                                                        | Rectal swabs (for <i>E.coli</i> ) und nasal swabs (for <i>Pasteurella multocida</i> ):<br>42±3.2 days., 1 year;<br>environmental samples | Natural |

Table S1: Summary of studies published between 2016-2020 and included in this narrative review – demographics, results and study descriptions

|                                              |            |                                                |                                                                                                                                                                                            |                                                                        |                                                                                                                          |                                                                                                   |                   |
|----------------------------------------------|------------|------------------------------------------------|--------------------------------------------------------------------------------------------------------------------------------------------------------------------------------------------|------------------------------------------------------------------------|--------------------------------------------------------------------------------------------------------------------------|---------------------------------------------------------------------------------------------------|-------------------|
| <p><b>Maynou et al, (2017b)</b><br/>[31]</p> | <p>USA</p> | <p>52 female calves<br/>(3 ± 1.3 days old)</p> | <p>Increased excretion of resistant <i>E. coli</i> (12 antimicrobials tested), reduced excretion with calf age.</p>                                                                        | <p>1) Pasteurised waste milk (pWM)<br/>2) Milk replacer (MR)</p>       | <p>Not known</p>                                                                                                         | <p>Rectal swabs:<br/>Study days 0, 35, 56</p>                                                     | <p>Natural</p>    |
| <p><b>Maynou et al, (2019)</b><br/>[32]</p>  | <p>USA</p> | <p>40 calves<br/>(2-5 days old)</p>            | <p>Non-specific influence on gut microbiota,<br/>Increased liveweight gain</p>                                                                                                             | <p>1) Pasteurised waste milk (pWM)<br/>2) Milk replacer (MR)</p>       | <p>Beta-lactam antimicrobials were detected in each batch of waste milk, other antimicrobials might also be present.</p> | <p>Faecal samples, nasal swabs, liveweight: twice a week.<br/>Microbiome analysed:<br/>Day 42</p> | <p>Natural</p>    |
| <p><b>Pereira et al, (2018)</b><br/>[33]</p> | <p>USA</p> | <p>30 calves</p>                               | <p>Significant difference in relative abundance of functional genes in bacteria, particularly those expressing for stress responses, regulation and cell signalling, and N metabolism.</p> | <p>1) Raw milk with antimicrobials added (DR)<br/>2) Raw milk (NR)</p> | <p>Ampicillin, ceftiofur, penicillin, oxytetracycline</p>                                                                | <p>Faecal samples:<br/>Weekly until 6 weeks old</p>                                               | <p>Artificial</p> |

Table S1: Summary of studies published between 2016-2020 and included in this narrative review – demographics, results and study descriptions

|                                          |                |                  |                                                                                                                                                                                                      |                                                                                                                              |                                                                                                                                                                     |                                                                                                              |                            |
|------------------------------------------|----------------|------------------|------------------------------------------------------------------------------------------------------------------------------------------------------------------------------------------------------|------------------------------------------------------------------------------------------------------------------------------|---------------------------------------------------------------------------------------------------------------------------------------------------------------------|--------------------------------------------------------------------------------------------------------------|----------------------------|
| <p><b>Tempini et al, (2018) [34]</b></p> | <p>USA</p>     | <p>25 farms</p>  | <p>60% of waste milk tested contained detectable concentration of at least 1 antimicrobial, 20% of <i>E.coli</i> (n=10) from waste milk were multidrug resistant</p>                                 | <p>(Survey)</p>                                                                                                              | <p>-</p>                                                                                                                                                            | <p>Milk samples from each farm<br/>Bulk tank / waste milk (1 sample/ farm)</p>                               | <p>Natural</p>             |
| <p><b>Tetens et al, (2019) [35]</b></p>  | <p>Germany</p> | <p>50 calves</p> | <p>Higher prevalence of ESBL producing <i>E.coli</i> on the farm using blanket dry cow therapy</p>                                                                                                   | <p>1) Colostrum from farms with selective drying off<br/>2) Colostrum from farms with blanket antibiotic dry cow therapy</p> | <p>Combination product (dihydro-streptomycin, nafcillin and penicillin-G procaine) for blanket DCT; Framecytin with penicillin or cloxacillin for selective DCT</p> | <p>Faecal samples:<br/>Day 3, 21 post-partum</p>                                                             | <p>Natural (colostrum)</p> |
| <p><b>Yousif et al, (2018) [36]</b></p>  | <p>China</p>   | <p>12 calves</p> | <p>Cocktail of antibiotics induced changes at different taxonomic levels, a decrease in <i>E.coli</i> was found in the group receiving the cocktail of antibiotics, which might reduce diarrhoea</p> | <p>1)Milk replacer without AB (CON)<br/>2) Milk replacer with low cocktail of AB (LCA)<br/>3) Milk replacer with one AB</p>  | <p>LCA: Penicillin, streptomycin, tetracycline, ceftiofur,<br/>LSA: Ceftiofur</p>                                                                                   | <p>Calves euthanised on Day 35:<br/>Digesta from ileum and colon, faecal samples, IgG from blood samples</p> | <p>Artificial</p>          |

Table S1: Summary of studies published between 2016-2020 and included in this narrative review – demographics, results and study descriptions

|                                 |       |                                |                                                                                                                                         |                                                                                                                              |                                          |                                                                                                                                                                                               |         |
|---------------------------------|-------|--------------------------------|-----------------------------------------------------------------------------------------------------------------------------------------|------------------------------------------------------------------------------------------------------------------------------|------------------------------------------|-----------------------------------------------------------------------------------------------------------------------------------------------------------------------------------------------|---------|
|                                 |       |                                |                                                                                                                                         | (LSA)                                                                                                                        |                                          |                                                                                                                                                                                               |         |
| <b>Zhang et al, (2019) [37]</b> | China | 54 calves (from 7 days of age) | Increased average daily weight gain, different bacterial community with WM                                                              | 1) Whole milk<br>2) Pasteurised waste milk<br>3) Milk replacer                                                               | Gentamicin (only residue detected in WM) | Stomach mass: Day 58 (n=3, male calves).<br>Feed intake & growth: Day 7, 14, 28, 49, 58, 90, 120, 150, 180 (female calves);<br>Blood samples, rumen fermentation: Day 60, 180 (female calves) | Natural |
| <b>Zou et al, (2017) [38]</b>   | China | 84 male calves                 | Increased liveweight gain, increased diarrhoea incidence, increased inflammation of jejunum and ileum, no difference in immune response | 1) Bulk tank milk (UBM)<br>2) Untreated waste milk (UWM)<br>3) Pasteurised waste milk (PWM)<br>4) Acidified waste milk (AWM) | Not known                                | Weight, Blood samples: Day 1, 22.<br>Diarrhoea: assessed daily<br>Small intestine tissue at d 22 (n=6)                                                                                        | Natural |

Table S1: Summary of studies published between 2016-2020 and included in this narrative review – demographics, results and study descriptions

Table S2: Aspects considered in the studies dealing with feeding waste milk and published since 2016.

| Author & Year                     | Excretion of AMR bacteria | Age of calves | Microbiome | Health | Transfer of bacteria |
|-----------------------------------|---------------------------|---------------|------------|--------|----------------------|
| Awosile et al ( 2018) [20]        | •                         | •             |            |        |                      |
| Awosile & Smith (2017) [21]       | •                         |               |            |        |                      |
| Calderon-Amor & Gallo (2020) [22] |                           |               |            | •      |                      |
| Deng et al (2017) [23]            |                           |               | •          | ○      |                      |
| Edrington et al (2018) [24]       | ○                         |               |            |        | •                    |
| Feng et al (2020) [25]            |                           |               | •          |        |                      |
| Foutz et al (2018) [26]           | •                         | •             |            |        |                      |
| Horton et al (2016) [27]          | •                         | •             |            |        | ○                    |
| Li et al (2019) [28]              |                           |               | ○          | •      |                      |
| Manga et al (2019) [29]           | •                         |               |            |        |                      |
| Maynou et al (2017a) [30]         | •                         | •             |            |        |                      |
| Maynou et al (2017b) [31]         | •                         | •             |            |        |                      |
| Maynou et al (2019) [32]          |                           |               | •          | ○      |                      |
| Pereira et al (2018) [33]         | ○                         | ○             | •          | ○      |                      |
| Tempini et al (2018) [34]         |                           |               |            |        | •                    |
| Tetens et al (2019) [35]          | •                         | •             |            |        |                      |
| Yousif et al (2018) [36]          |                           |               | •          |        |                      |
| Zhang et al (2019) [37]           |                           | •             | •          | ○      |                      |
| Zou et al (2017) [38]             |                           |               |            | •      |                      |

• = Primary focus of the study; ○ = Secondary focus of the study.
